# Supplementary material
Source: HighWire-hosted journal article supplement (http://cmajopen.ca/highwire/filestream/81277/field_highwire_adjunct_files/1/2019-0038-2-at.pdf)
Supplement: 2019-0038-2-at.pdf [file 2019-0038-2-at.pdf]

| <b>Appendix 2 (as supplied by the authors): Definitions of physician utilization measures</b> |                 |              |                                                     |  |  |
|-----------------------------------------------------------------------------------------------|-----------------|--------------|-----------------------------------------------------|--|--|
| <b>Measure</b>                                                                                | <b>Database</b> | <b>Field</b> | <b>Values</b>                                       |  |  |
| PCP Visit                                                                                     | OHIP            | Spec         | 00 - FP/GP                                          |  |  |
|                                                                                               |                 |              | 05 - Community Medicine                             |  |  |
|                                                                                               | OHIP            | Feecode      | Any feecode with location of Office, Home, or Phone |  |  |
|                                                                                               |                 |              | G202                                                |  |  |
|                                                                                               |                 |              | G212                                                |  |  |
|                                                                                               |                 |              | G372                                                |  |  |
|                                                                                               |                 |              | G373                                                |  |  |
|                                                                                               |                 |              | G365                                                |  |  |
|                                                                                               |                 |              | G538                                                |  |  |
|                                                                                               |                 |              | G539                                                |  |  |
|                                                                                               |                 | G590         |                                                     |  |  |
|                                                                                               |                 | G591         |                                                     |  |  |
| PCP coordination with home care                                                               | OHIP            | Spec         | 00 - FP/GP                                          |  |  |
|                                                                                               |                 |              | 05 - Community Medicine                             |  |  |
|                                                                                               | OHIP            | Feecode      | K071                                                |  |  |
|                                                                                               |                 |              | K072                                                |  |  |
|                                                                                               |                 | K124         |                                                     |  |  |
| PCP home visit                                                                                | OHIP            | Spec         | 00 - FP/GP                                          |  |  |
|                                                                                               |                 |              | 05 - Community Medicine                             |  |  |
|                                                                                               | OHIP            | Feecode      | A900                                                |  |  |
|                                                                                               |                 |              | A901                                                |  |  |
|                                                                                               |                 |              | B960                                                |  |  |
|                                                                                               |                 |              | B961                                                |  |  |
|                                                                                               |                 |              | B962                                                |  |  |
|                                                                                               |                 |              | B963                                                |  |  |
|                                                                                               |                 |              | B964                                                |  |  |
|                                                                                               |                 |              | B966                                                |  |  |
|                                                                                               |                 |              | B990                                                |  |  |
|                                                                                               |                 |              | B992                                                |  |  |
|                                                                                               |                 |              | B993                                                |  |  |
|                                                                                               |                 |              | B994                                                |  |  |
|                                                                                               |                 |              | B996                                                |  |  |
|                                                                                               |                 |              | B997                                                |  |  |
|                                                                                               |                 | B998         |                                                     |  |  |
| PCP afterhours/weekend visit                                                                  | OHIP            | Spec         | 00 - FP/GP                                          |  |  |
|                                                                                               |                 |              | 05 - Community Medicine                             |  |  |
|                                                                                               | OHIP            | Feecode      | Q012                                                |  |  |

|                                                                      |      |         |                                                             |  |
|----------------------------------------------------------------------|------|---------|-------------------------------------------------------------|--|
|                                                                      |      |         | Q016                                                        |  |
|                                                                      |      |         | Q017                                                        |  |
|                                                                      |      |         | B962                                                        |  |
|                                                                      |      |         | B963                                                        |  |
|                                                                      |      |         | B964                                                        |  |
|                                                                      |      |         | B994                                                        |  |
|                                                                      |      |         | B993                                                        |  |
|                                                                      |      |         | B996                                                        |  |
|                                                                      |      |         | A962                                                        |  |
|                                                                      |      |         | A963                                                        |  |
|                                                                      |      |         | A964                                                        |  |
|                                                                      |      |         | A994                                                        |  |
|                                                                      |      |         | A998                                                        |  |
|                                                                      |      |         | A996                                                        |  |
|                                                                      |      |         | A888                                                        |  |
| Physician specialist visits                                          | OHIP | Spec    | Not 00 - FP/GP, 05 - Community Medicine, or 26 - Pediatrics |  |
|                                                                      | OHIP | Feecode | Any feecode with location of Office, Home, or Phone         |  |
| Note: Visits were limited to 1 per patient per physician per day     |      |         |                                                             |  |
| Note: Visits were excluded if patient was in LTCH at time of billing |      |         |                                                             |  |
